# Supplementary material for: Mechanism of highly enhanced hydrogen storage by two-dimensional 1T′ MoS2
Source: Royal Society of Chemistry journal article supplement (doi:10.1039/c9cp04402g), 2019-10-22
Supplement: c9cp04402g1.pdf [file c9cp04402g1.pdf]

## Supporting Information

### **Mechanism of highly-enhanced hydrogen storage by two-dimensional 1T' MoS<sub>2</sub>**

Junyu Chen <sup>a</sup>, Jiamu Cao <sup>a,b,\*</sup>, Jing Zhou <sup>a,\*</sup>, Yufeng Zhang <sup>a,b,\*</sup>, Mingxue Li <sup>a</sup>, Weiqi Wang <sup>a</sup>, Junfeng Liu <sup>a</sup>, Xiaowei Liu <sup>a,b</sup>

<sup>a</sup>*MEMS Center, Harbin Institute of Technology, 150001, China.*

<sup>b</sup>*Key Laboratory of Micro-systems and Micro-Structures Manufacturing, Ministry of Education, 150001, China.*

\*corresponding author

E-mail: caojiamu@hit.edu.cn (J.M. Cao)

E-mail: daxiongmao@hit.edu.cn (J. Zhou)

E-mail: yufeng\_zhang@hit.edu.cn (Y.F. Zhang)

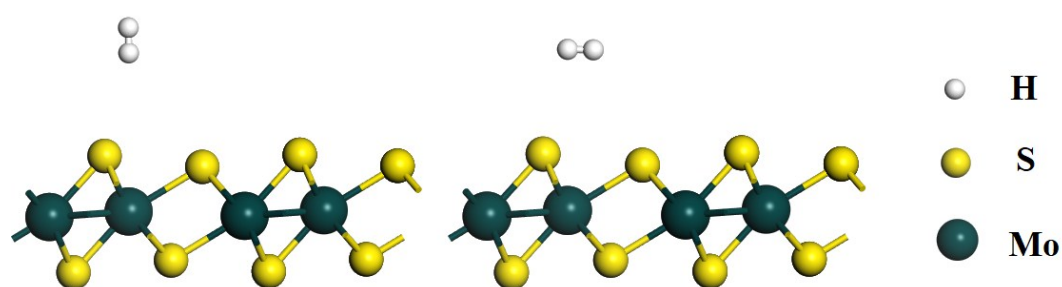

**Figure S1.** Adsorption forms of hydrogen molecules (a) vertically to the materials plane (b) horizontally to the materials plane

Figure S1 shows the two forms of hydrogen adsorbed on the surface of the materials. The adsorption positions were set on the basis of on hydrogen atom in the hydrogen molecule; and the origin distance between the benchmarking hydrogen atom and the centroid of the upper S atoms were fixed as 3 Å. We can also call the two forms of adsorption as edge on (vertically) and side on (horizontally)[1].

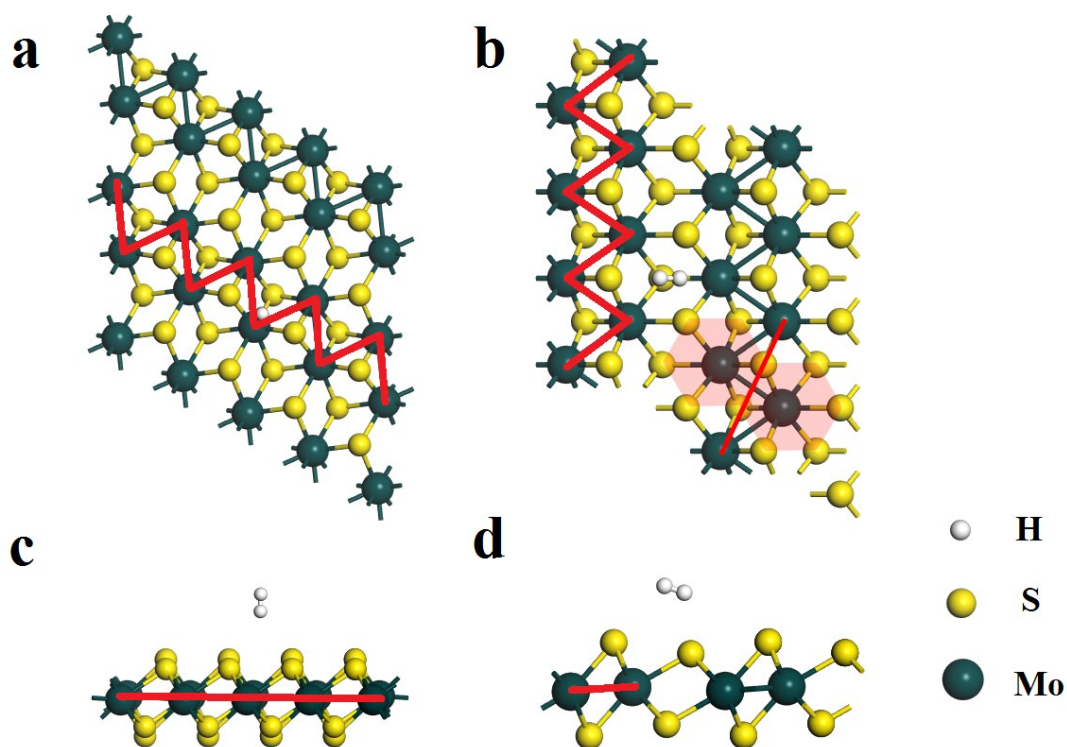

**Figure S2.** The most stable position of hydrogen molecule adsorbed on (a) and (c) pristine 1T-phase MoS<sub>2</sub>, (b) and (d) pristine 1T'-phase MoS<sub>2</sub>

Figure S2 shows the situations of single hydrogen molecule adsorbed on the 1T or 1T'

MoS<sub>2</sub> that has the largest adsorption energy. Namely the cases that the acting forces between the hydrogen molecules and materials are the strongest[2]. For 1T MoS<sub>2</sub>, it is above the middle of Mo atom and lower layer S atom, and the hydrogen did not move much after optimization. But the structure of MoS<sub>2</sub> changes a lot, similar to 1T' MoS<sub>2</sub>, there are Mo-Mo bonds between every two rows of Mo atoms. This also adds to the change of the total energy, and it will make the adsorption energy results to be inaccurate. So, this method cannot calculate the adsorption energy when hydrogen molecules adsorbed on 1T MoS<sub>2</sub>. But for the 1T' MoS<sub>2</sub>, the structure was hardly changed, the energy change after geometry optimization are mostly adsorption energy. Thus, the study can be carried out.

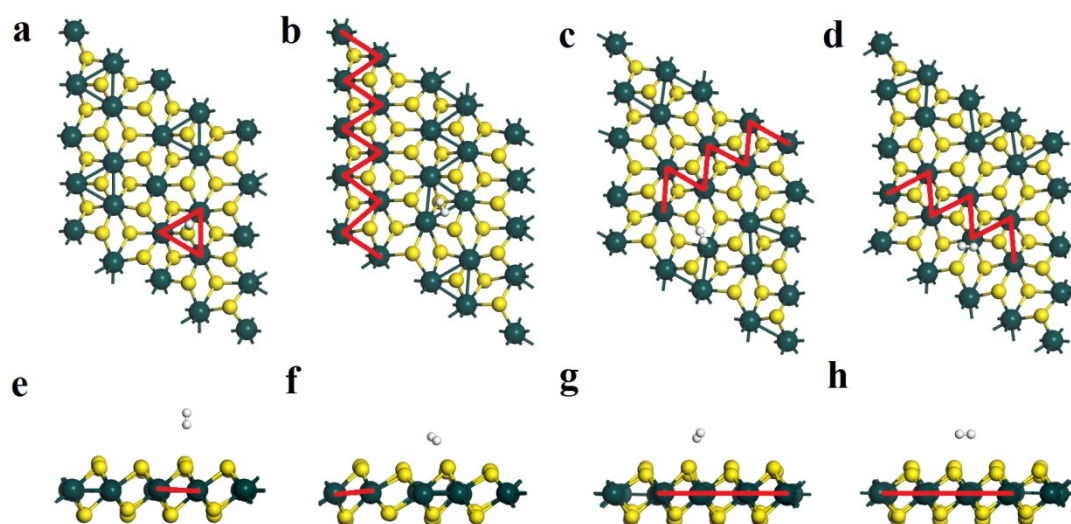

**Figure S3.** Geometry optimization results for single hydrogen molecule adsorbed on 1T MoS<sub>2</sub>; (a) and (e) right above the upper layer S atom site (b) and (f) right above the lower layer S atom site (c) and (g) right above the Mo atom site (d) and (h) above the middle of Mo atom and upper layer S atom.

Figure S3 presents the other four cases when hydrogen adsorbed on the 1T-phase MoS<sub>2</sub>, the results also show that the structure of 1T-phase MoS<sub>2</sub> changes in different ways when the adsorption sites are different. Except for the first one, we can see that the zipper structure appears after the geometry optimization. For the one that the hydrogen molecule was set above the upper layer S atom site, after optimization, the neighboring three Mo atoms formed bonds, constituted a triangle structure. Such structure is very similar to the 1T'' MoS<sub>2</sub> structure[3].

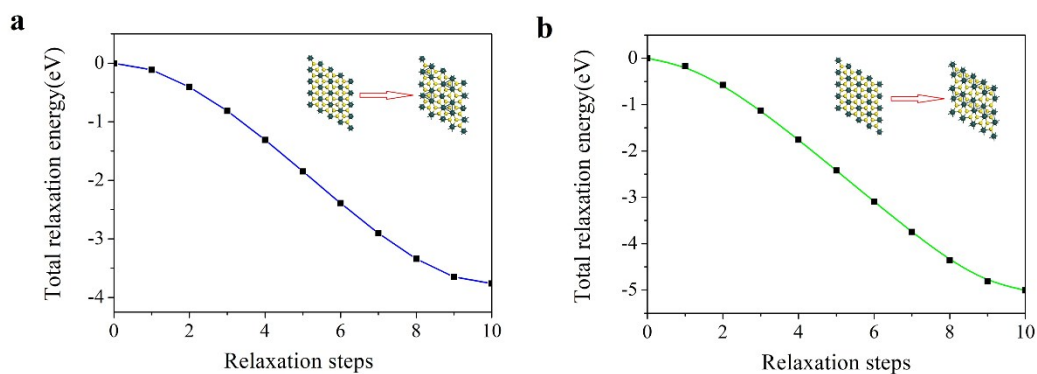

**Figure S4.** TS search results of two situations of one hydrogen molecule adsorbed on 1T MoS<sub>2</sub>. (a) hydrogen molecule right above the upper layer S atom site (b) hydrogen molecule above the middle of Mo atom and lower layer S atom.

Figure S4 shows the energy change results while hydrogen molecules adsorbed on two different sites of the 1T phase MoS<sub>2</sub>. Both of them has no energy barrier during conversion. For the first one (shown as Figure S4 (a)), the target structure is similar to that of 1T'' MoS<sub>2</sub>, the relaxation energy is about -3.76eV. The target structure for the second one (shown as Figure S4 (b)) is 1T'-like structure, the relaxation energy is about 5.01eV.

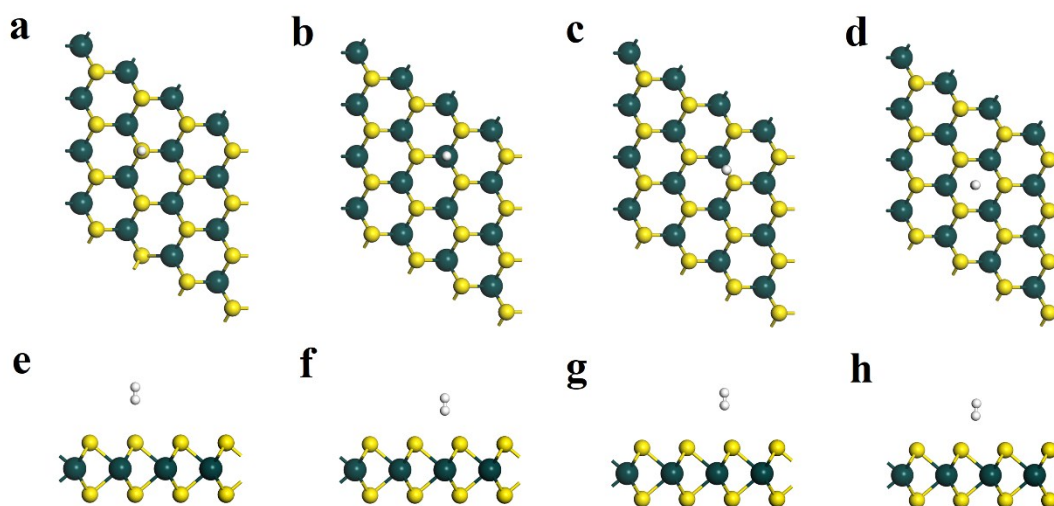

**Figure S5.** Positions of a hydrogen molecule adsorbed on the pristine-2H MoS<sub>2</sub> (a) and (e) Top of S atom (b) and (f) Top of Mo atom (c) and (g) Top of the middle of S-Mo band (d) and (h) Top of the center of hexagonal

Figure S5 shows our previous result of hydrogen molecule adsorbed on the pristine-2H MoS<sub>2</sub>[4]. The most stable position of adsorption is shown in (b) and (f) (After comparing the results shown in Table S3). The calculated hydrogen adsorption energy is -0.188eV, which is not in the provided range (-0.2 to -0.6 eV) of the ideal adsorption energy for hydrogen storage. Indicating that the phase change really gives a promotion to the 2H MoS<sub>2</sub> in hydrogen storage applications.

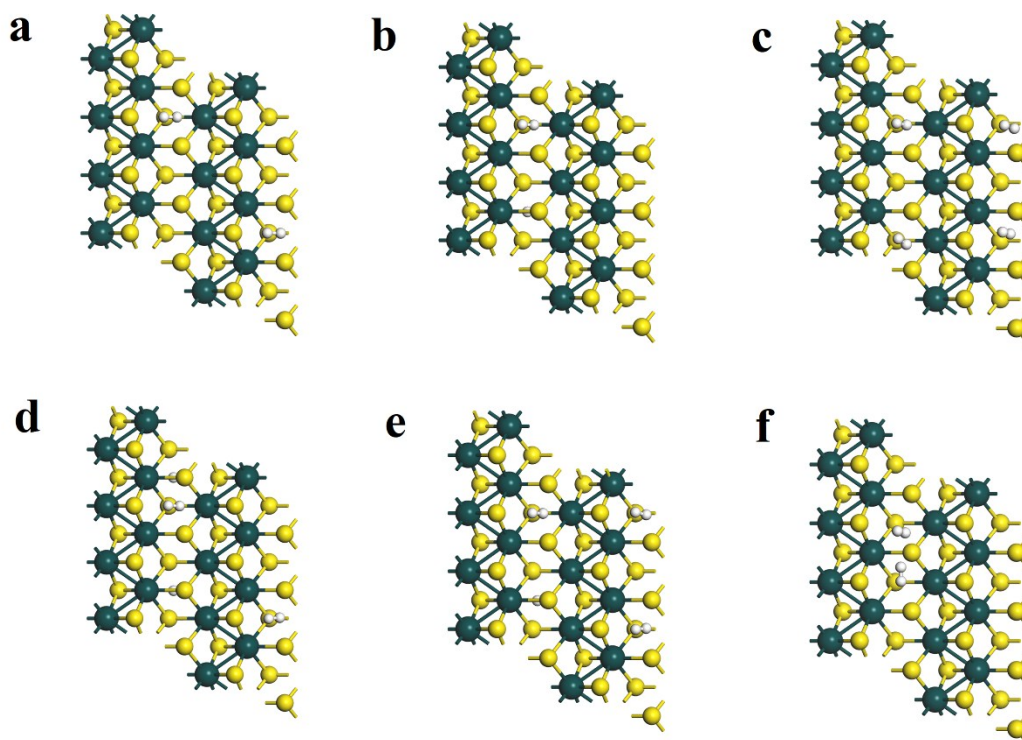

**Figure S6.** Geometry optimization results of 2 or 4 hydrogen molecules adsorbed with different cases of arrangement. (a) 2H<sub>2</sub> on the same side (b) 2H<sub>2</sub> on different sides (c) 4H<sub>2</sub> on the same side (d) and (e) 4H<sub>2</sub> on different sides (f) 2H<sub>2</sub> on the neighbouring sites

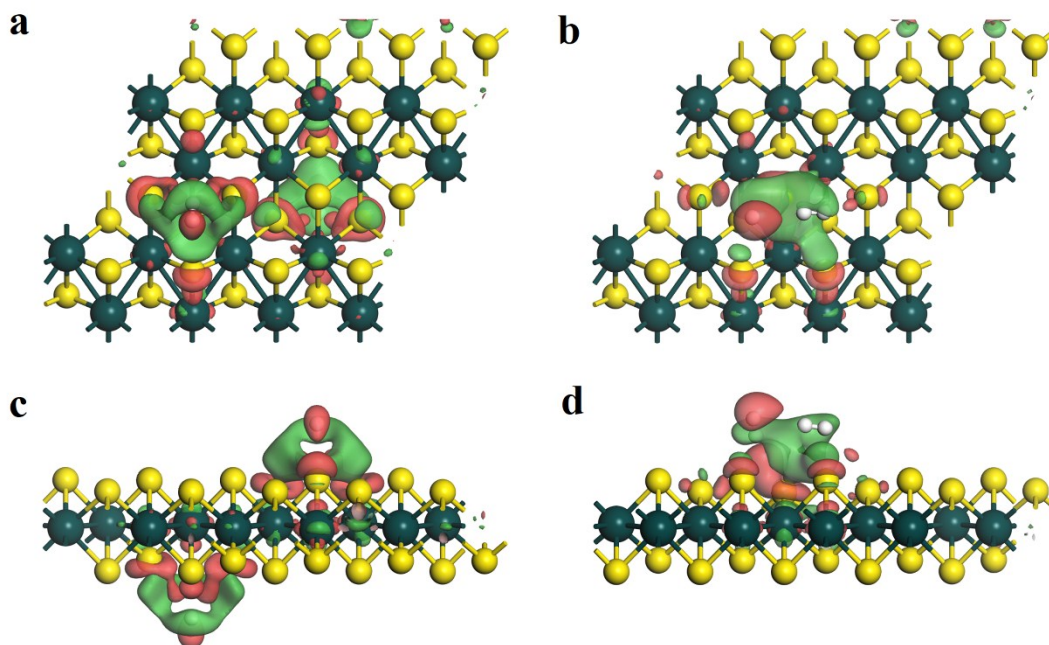

**Figure S7.** Electron density difference results for the cases when two hydrogen molecules adsorbed on (a) and (c) different sides of 1T' MoS<sub>2</sub> plane (b) and (d) neighbouring sites of 1T' MoS<sub>2</sub>. The isosurface value is taken as 0.001 e/bohr<sup>3</sup>.

Figure S7 shows the electron density difference results for the cases when two adsorbed hydrogen molecules arranged in different ways. The red area presents positive value area while the green area is negative area. The results show that S atoms near the adsorbed hydrogen molecules tend to obtain electrons and the atoms in a hydrogen molecule closer to the basement material plane tend to lose electrons. Moreover, from Figure S7 (b) and (d) we can also see that: when two hydrogen molecules were set close enough, they had interaction each other. And that makes their resultant force to the substrate material different from that of separated two molecules.



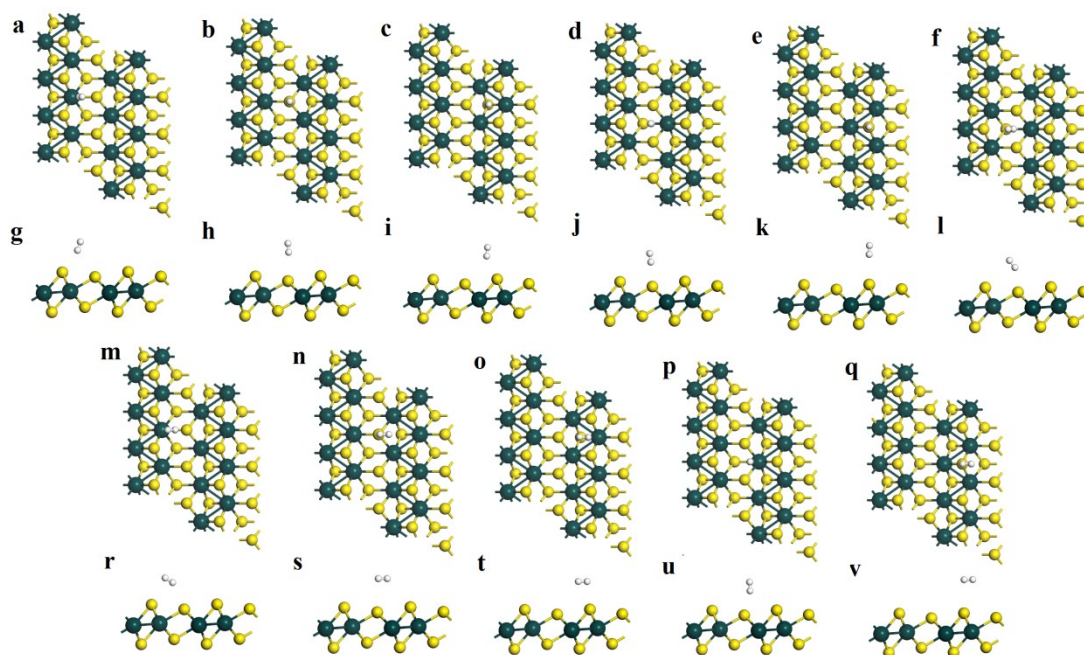

**Figure S8.** Geometry optimization results for single hydrogen molecule adsorbed on 1T' MoS<sub>2</sub>; (a) and (g) edge on the Mo-1 site (b) and (h) edge on the upper S-1 site (c) and (i) edge on the lower S-2 site (d) and (j) edge on the Mo-2 site (e) and (k) edge on the upper S-2 site (f) and (l) edge on the lower S-1 site (m) and (r) side on the Mo-1 site (n) and (s) side on the upper S-1 site (o) and (t) side on the lower S-2 site (p) and (u) side on the Mo-2 site (q) and (v) side on the upper S-2 site

Figure S8 presents the other situations when a single hydrogen molecule adsorbed on the 1T' MoS<sub>2</sub>. We can see that if the hydrogen molecule was set vertically to the plane, the optimization results of hydrogen molecules also tend to be vertically. Also for the ones set horizontally, the results were mostly horizontally (except for the one shown in (p) and (u)). Then combined with the adsorption energy result. The adsorption system structures with higher adsorption energies usually the ones that hydrogen molecules set in the hollow sites of the 1T' MoS<sub>2</sub> structures (such as the ones shown in Figure S2 (c) and Figure S8 (f)). While that set in the ledge sites often have lower adsorption energy (such as the ones shown in Figure S8 (e) and (o)). That indicates hollow site can better accommodate target gas molecules. In other words, target gas molecules adsorbed on the hollow sites of the adsorbing materials can form a more stable adsorption system. Similar results have been shown in other studies [5-6].

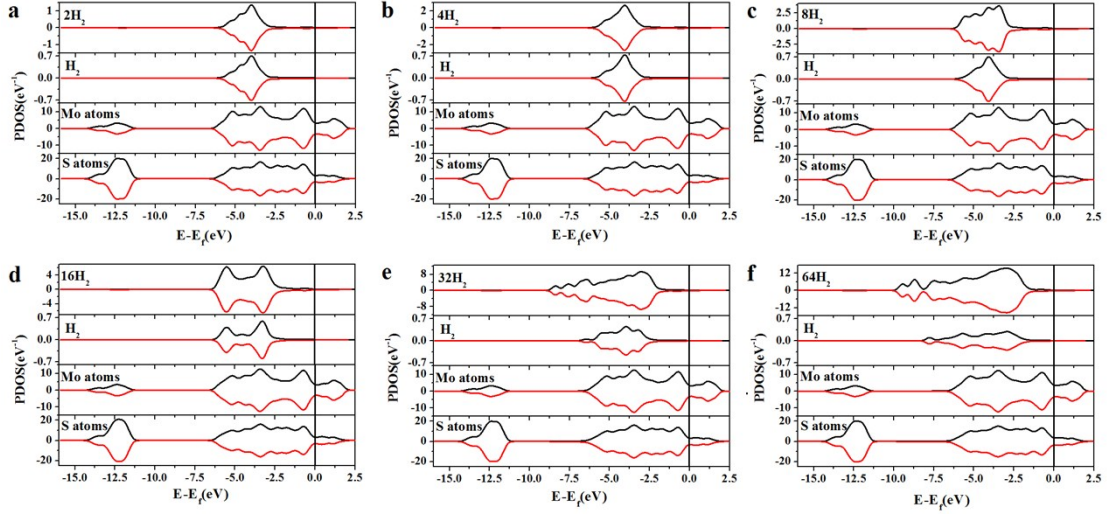

**Figure S9.** PDOS of  $H_2$  adsorption system for (a)  $2H_2$  molecules (b)  $4H_2$  molecules (c)  $8H_2$  molecules (d)  $16H_2$  molecules (e)  $32H_2$  molecules (f)  $64H_2$  molecules absorbed on the 1T'  $MoS_2$

Figure S9 shows the PDOS results of multiple hydrogen molecules adsorbed on the 1T'  $MoS_2$ . With the increase of the quantity of hydrogen molecules, the PDOS for Mo atoms and S atoms hardly changed, while the PDOS for hydrogen became dispersed. And that makes the overlapping of the electron orbit between the hydrogen molecules and 1T'  $MoS_2$ . As a consequence, the average adsorption energy increases.



**Table S1**Structural parameters of 1T and 1T' MoS<sub>2</sub> in previous studies

| Number | Type(1T/1T') | Structural Parameters(Å) |          |             |             | reference  |
|--------|--------------|--------------------------|----------|-------------|-------------|------------|
|        |              | $l_{ca}/l_{cb}$          | $\theta$ | $l_{Mo-S}$  | $l_{Mo-Mo}$ |            |
| 1      | 1T           | 3.10/3.10                | 120      |             | -           | [7]        |
|        | 1T'          | 3.11/5.63                |          |             |             |            |
| 2      | 1T'          | 3.18/5.75                |          |             |             | [8]        |
| 3      | 1T'          | 3.17/5.72                |          | 2.41        |             | [9]        |
| 4      | 1T'          | 3.14/5.69                | 119.0    |             |             | [10]       |
| 5      | 1T           | 3.16/3.16                | 120      |             | -           | [11]       |
| 6      | 1T           | 3.19/3.19                | 120      | 2.46        | -           | [12]       |
|        | 1T'          | 3.19/5.75                |          | 2.42-2.50   | 2.75        |            |
| 7      | 1T           | 3.16/3.16                | 120      |             |             | [13]       |
|        | 1T'          | 3.21/5.78                |          |             |             |            |
| 8      | 1T'          |                          |          | 2.39-2.51   | 2.77        | [14]       |
| 9      | 1T           | 3.24/3.24                | 120      | 2.427       | -           | This study |
|        | 1T'          | 3.19/5.70                | 119.25   | 2.386-2.463 | 2.778       |            |

 $l_{ca}/l_{cb}$ : lattice constants a/b; $\theta$ : lattice angle; $l_{Mo-S}$ : length of Mo-S bond; $l_{Mo-Mo}$ : length of Mo-Mo bond

**Table S2**

The primitive values of  $E_{\text{hyd+sys}}$ ,  $E_{\text{sys}}$  and  $E_{\text{hyd}}$  for single hydrogen molecule adsorption

| Structures               | E <sub>hyd+sys</sub> (Ha) | E <sub>sys</sub> (Ha) | E <sub>hyd</sub> (Ha) |
|--------------------------|---------------------------|-----------------------|-----------------------|
| 2H MoS <sub>2</sub> -1   | -14224.4150474            | -14223.2739505        | -1.1359179            |
| 2H MoS <sub>2</sub> -2   | -14224.4169791            |                       |                       |
| 2H MoS <sub>2</sub> -3   | -14224.4154171            |                       |                       |
| 2H MoS <sub>2</sub> -4   | -14224.4164899            |                       |                       |
| 1T MoS <sub>2</sub> -1   | -14224.0008995            | -14222.7239255        |                       |
| 1T MoS <sub>2</sub> -2   | -14224.0292101            |                       |                       |
| 1T MoS <sub>2</sub> -3   | -14224.0310464            |                       |                       |
| 1T MoS <sub>2</sub> -4   | -14224.0307476            |                       |                       |
| 1T MoS <sub>2</sub> -5   | -14224.0427778            |                       |                       |
| 1T' MoS <sub>2</sub> -1  | -14224.0600580            | -14222.9137439        |                       |
| 1T' MoS <sub>2</sub> -2  | -14224.0588839            |                       |                       |
| 1T' MoS <sub>2</sub> -3  | -14224.0590833            |                       |                       |
| 1T' MoS <sub>2</sub> -4  | -14224.0608980            |                       |                       |
| 1T' MoS <sub>2</sub> -5  | -14224.0569484            |                       |                       |
| 1T' MoS <sub>2</sub> -6  | -14224.0609222            |                       |                       |
| 1T' MoS <sub>2</sub> -7  | -14224.0607833            |                       |                       |
| 1T' MoS <sub>2</sub> -8  | -14224.0578881            |                       |                       |
| 1T' MoS <sub>2</sub> -9  | -14224.0585278            |                       |                       |
| 1T' MoS <sub>2</sub> -10 | -14224.0606484            |                       |                       |
| 1T' MoS <sub>2</sub> -11 | -14224.0614859            |                       |                       |
| 1T' MoS <sub>2</sub> -12 | -14224.0659431            |                       |                       |

**Table S3**

The primitive values of  $E_{\text{hyd+sys}}$  for multiple hydrogen molecule adsorption

| <b>Number of H<sub>2</sub> molecules</b> | <b><math>E_{\text{hyd+sys}}</math> for 1T'-phase MoS<sub>2</sub> (Ha)</b> | <b>Number of H<sub>2</sub> molecules</b> | <b><math>E_{\text{hyd+sys}}</math> for 1T'-phase MoS<sub>2</sub> (Ha)</b> |
|------------------------------------------|---------------------------------------------------------------------------|------------------------------------------|---------------------------------------------------------------------------|
| <b>2</b>                                 | -14225.2131473                                                            | <b>18</b>                                | -14243.6425001                                                            |
| <b>3</b>                                 | -14226.3603560                                                            | <b>20</b>                                | -14245.9374215                                                            |
| <b>4</b>                                 | -14227.5074933                                                            | <b>22</b>                                | -14248.2959926                                                            |
| <b>5</b>                                 | -14228.6566158                                                            | <b>24</b>                                | -14250.6562953                                                            |
| <b>6</b>                                 | -14229.8041312                                                            | <b>28</b>                                | -14255.3078347                                                            |
| <b>7</b>                                 | -14230.9502832                                                            | <b>32</b>                                | -14259.8996812                                                            |
| <b>8</b>                                 | -14232.1001668                                                            | <b>40</b>                                | -14269.2129720                                                            |
| <b>10</b>                                | -14234.4172001                                                            | <b>48</b>                                | -14278.4401752                                                            |
| <b>12</b>                                | -14236.7192759                                                            | <b>52</b>                                | -14283.1267153                                                            |
| <b>14</b>                                | -14239.0168379                                                            | <b>56</b>                                | -14287.8010567                                                            |
| <b>16</b>                                | -14241.3200993                                                            | <b>64</b>                                | -14297.1736025                                                            |

**Table S4**

The values of total adsorption energy  $E_{\text{ads-tol}}$  for single hydrogen molecule adsorption.

| <b>Structures</b>           | <b>2H MoS<sub>2</sub></b>       | <b>Structures</b>             | <b>1T' MoS<sub>2</sub></b>      |
|-----------------------------|---------------------------------|-------------------------------|---------------------------------|
|                             | $E_{\text{ads-tol}}(\text{eV})$ |                               | $E_{\text{ads-tol}}(\text{eV})$ |
| <b>1T MoS<sub>2</sub>-1</b> | -0.1409                         | <b>1T' MoS<sub>2</sub>-1</b>  | -0.2829                         |
| <b>1T MoS<sub>2</sub>-2</b> | -0.1884                         | <b>1T' MoS<sub>2</sub>-2</b>  | -0.2509                         |
| <b>1T MoS<sub>2</sub>-3</b> | -0.1510                         | <b>1T' MoS<sub>2</sub>-3</b>  | -0.2564                         |
| <b>1T MoS<sub>2</sub>-4</b> | -0.1802                         | <b>1T' MoS<sub>2</sub>-4</b>  | -0.3058                         |
|                             |                                 | <b>1T' MoS<sub>2</sub>-5</b>  | -0.1983                         |
| <b>Structures</b>           | <b>1T MoS<sub>2</sub></b>       | <b>1T' MoS<sub>2</sub>-6</b>  | -0.3064                         |
|                             | $E_{\text{ads-tol}}(\text{eV})$ | <b>1T' MoS<sub>2</sub>-7</b>  | -0.3026                         |
| <b>1T MoS<sub>2</sub>-1</b> | -3.861                          | <b>1T' MoS<sub>2</sub>-8</b>  | -0.2238                         |
| <b>1T MoS<sub>2</sub>-2</b> | -4.631                          | <b>1T' MoS<sub>2</sub>-9</b>  | -0.2413                         |
| <b>1T MoS<sub>2</sub>-3</b> | -4.681                          | <b>1T' MoS<sub>2</sub>-10</b> | -0.2990                         |
| <b>1T MoS<sub>2</sub>-4</b> | -4.673                          | <b>1T' MoS<sub>2</sub>-11</b> | -0.3218                         |
| <b>1T MoS<sub>2</sub>-5</b> | -5.001                          | <b>1T' MoS<sub>2</sub>-12</b> | -0.4430                         |

**Table S5**

The absolute values of average adsorption energy  $E_{\text{ads-ave}}$  of hydrogen molecules for different arrangement cases.

| Number<br>of H <sub>2</sub><br>molecules | 1T' MoS <sub>2</sub>           |                           | Number<br>of H <sub>2</sub><br>molecules | 1T' MoS <sub>2</sub>           |                           |
|------------------------------------------|--------------------------------|---------------------------|------------------------------------------|--------------------------------|---------------------------|
|                                          | N <sub>1</sub> /N <sub>2</sub> | $E_{\text{ads-ave}}$ (eV) |                                          | N <sub>1</sub> /N <sub>2</sub> | $E_{\text{ads-ave}}$ (eV) |
| <b>2</b>                                 | 2/0                            | 0.3765                    | <b>4</b>                                 | 4/0                            | 0.3416                    |
|                                          | 1/1                            | 0.3751                    |                                          | 3/1                            | 0.3412                    |
|                                          | 2n/0                           | 0.4351                    |                                          | 2/2                            | 0.3407                    |

N<sub>1</sub>, N<sub>2</sub>: Number of hydrogen molecules on the two sides of 1T' MoS<sub>2</sub> plane.

2n means two molecules on the neighbouring sites.

**Table S6**

The absolute values of total adsorption energy  $E_{\text{ads-tol}}$  and average adsorption energy  $E_{\text{ads-ave}}$  for multiple hydrogen molecules adsorption.

| Number<br>of H <sub>2</sub><br>molecules | 1T' MoS <sub>2</sub>      |                           | Number<br>of H <sub>2</sub><br>molecules | 1T' MoS <sub>2</sub>      |                           |
|------------------------------------------|---------------------------|---------------------------|------------------------------------------|---------------------------|---------------------------|
|                                          | $E_{\text{ads-tol}}$ (eV) | $E_{\text{ads-ave}}$ (eV) |                                          | $E_{\text{ads-tol}}$ (eV) | $E_{\text{ads-ave}}$ (eV) |
| <b>1</b>                                 | 0.443                     | 0.443                     | <b>16</b>                                | 6.304                     | 0.394                     |
| <b>2</b>                                 | 0.7502                    | 0.3751                    | <b>18</b>                                | 7.68                      | 0.4267                    |
| <b>3</b>                                 | 1.184                     | 0.3947                    | <b>20</b>                                | 8.3626                    | 0.4181                    |
| <b>4</b>                                 | 1.3627                    | 0.3407                    | <b>22</b>                                | 10.6684                   | 0.4849                    |
| <b>5</b>                                 | 1.722                     | 0.3444                    | <b>24</b>                                | 13.0757                   | 0.5448                    |
| <b>6</b>                                 | 2.0376                    | 0.3396                    | <b>28</b>                                | 16.0109                   | 0.5718                    |
| <b>7</b>                                 | 2.3161                    | 0.3309                    | <b>32</b>                                | 17.3218                   | 0.5413                    |
| <b>8</b>                                 | 2.6961                    | 0.337                     | <b>40</b>                                | 23.4702                   | 0.5868                    |
| <b>10</b>                                | 3.926                     | 0.3926                    | <b>48</b>                                | 27.2759                   | 0.5682                    |
| <b>12</b>                                | 4.7489                    | 0.3957                    | <b>56</b>                                | 34.7193                   | 0.62                      |
| <b>14</b>                                | 5.4489                    | 0.3892                    | <b>64</b>                                | 42.4801                   | 0.6637                    |

## References

[1] Shun Wang, Yulei Du, Wenhe Liao, Zhengming Sun, Hydrogen adsorption, dissociation and

- diffusion on two-dimensional  $\text{Ti}_2\text{C}$  monolayer, *International Journal of Hydrogen Energy*, 2017, 42, 27214-27219.
- [2] Omar Faye, Jerzy A Szpunar, Barbara Szpunar, Aboubaker Chedikh Beye, Hydrogen adsorption and storage on Palladium-functionalized graphene with NH-dopant: A first principles calculation, *Applied Surface Science*, 2017, 392, 362-374.
- [3] Wen Zhao, Feng Ding, Energetics and kinetics of phase transition between a 2H and a 1T  $\text{MoS}_2$  monolayer-- a theoretical study, *Nanoscale*, 2017, 9, 2031.
- [4] Hao Luo, Jiamu Cao, Jing Zhou, Yufeng Zhang, Xiaowei Liu, Theoretical study of  $\text{H}_2$  adsorbed on monolayer  $\text{MoS}_2$  doped with N, Si, P, *Microelectronic Engineering*, 2018, 190, 63–67.
- [5] S. Seenithurai, R. kodi Pandyan, S.Vinodh Kumar, C. Saranya, Li-decorated double vacancy graphene for hydrogen storage application: A first principles study, *International Journal of Hydrogen Energy*, 2014, 39, 11016-11026.
- [6] Yanan Zhou, Wei Chu, Fangli Jing, Jian Zheng, Wenjing Sun, Ying Xue, Enhanced hydrogen storage on Li-doped defective graphene with B substitution: A DFT study, *Applied Surface Science*, 2017, 410, 166-176.
- [7] Faling Ling, Huirong Jing, Yankun Chen, Wei Kang, Wen Zeng, Xiaoqing Liu, Yixin Zhang, Liang Fang, Miao Zho, Metastable phase control of two-dimensional transition metal dichalcogenides on metal substrates, *Journal of Materials Chemistry C*, 2018, 6, 12245.
- [8] Dipankar Saha, Santanu Mahapatra, Anisotropic transport in 1T' monolayer  $\text{MoS}_2$  and its metal interfaces, *Physical Chemistry Chemical Physics*, 2017, 19, 10453-10461.
- [9] H. H. Huang, Xiaofeng Fan, David J. Singh, W. T. Zheng, First principles study on 2H-1T' transition in  $\text{MoS}_2$  with copper, *Physical Chemistry Chemical Physics*, 2018, 20, 26986-26994.



- [10] Darwin Barayang Putungan, Shi-Hsin Lin, Jer-Lai Kuo, A first-principles examination of conducting monolayer 1T'-MX<sub>2</sub> (M = Mo, W; X = S, Se, Te): promising catalysts for hydrogen evolution reaction and its enhancement by strain, *Physical Chemistry Chemical Physics*, 2015, 17, 21702.
- [11] M. Luo, Y.E. Xu, Electrically tunable band gap of the 1T-MoS<sub>2</sub> based heterostructure: A first principles calculation, *Optik*, 2018, 159, 222-228.
- [12] Michele Pizzochero, Oleg V. Yazyev, Point defects in the 1T' and 2H phases of single-layer MoS<sub>2</sub>: A comparative first-principles study, *Physical Review B*, 2017, 96, 245402.
- [13] Joakim Ekspö, Robin Sandström, Lakshmy Pulickal Rajukumar, Mauricio Terrones, Thomas Wågberg, Eduardo Gracia-Espino, Stable Sulfur-Intercalated 1T' MoS<sub>2</sub> on Graphitic Nanoribbons as Hydrogen Evolution Electrocatalyst, *Advanced Functional Materials*, 2018, 28, 1802744.
- [14] Kaiyun Chen, Junkai Deng, Xiangdong Ding, Jun Sun, Sen Yang, Jefferson Zhe Liu, Ferromagnetism of 1T'-MoS<sub>2</sub> Nanoribbons Stabilized by Edge Reconstruction and Its Periodic Variation on Nanoribbons Width, *JACS*, 2018, 140, 16206-16212.
